# Supplementary material for: A novel 3D human glioblastoma cell culture system for modeling drug and radiation responses
Source: PubMed Central journal article supplement — Neuro Oncol. 2016 Aug 30;19(2):229–41. doi: 10.1093/neuonc/now164 (PMC5463789; doi:10.1093/neuonc/now164), 2016-08-30
Supplement: now164_suppl_Supplemental_Fig5.pdf [file now164_suppl_Supplemental_Fig5.pdf]

# Supplementary Figure 5

**A**

**B**

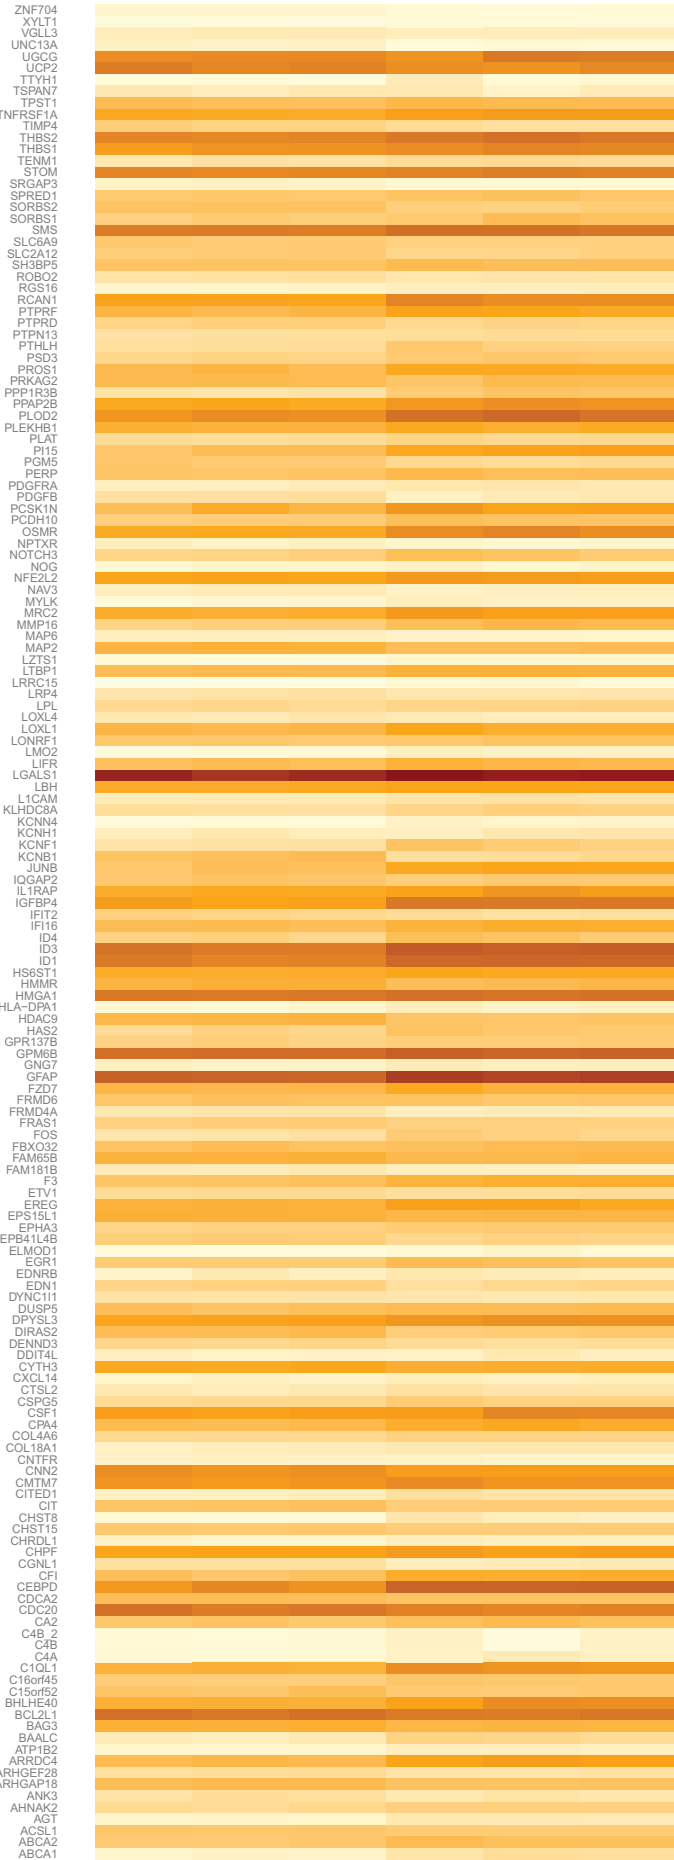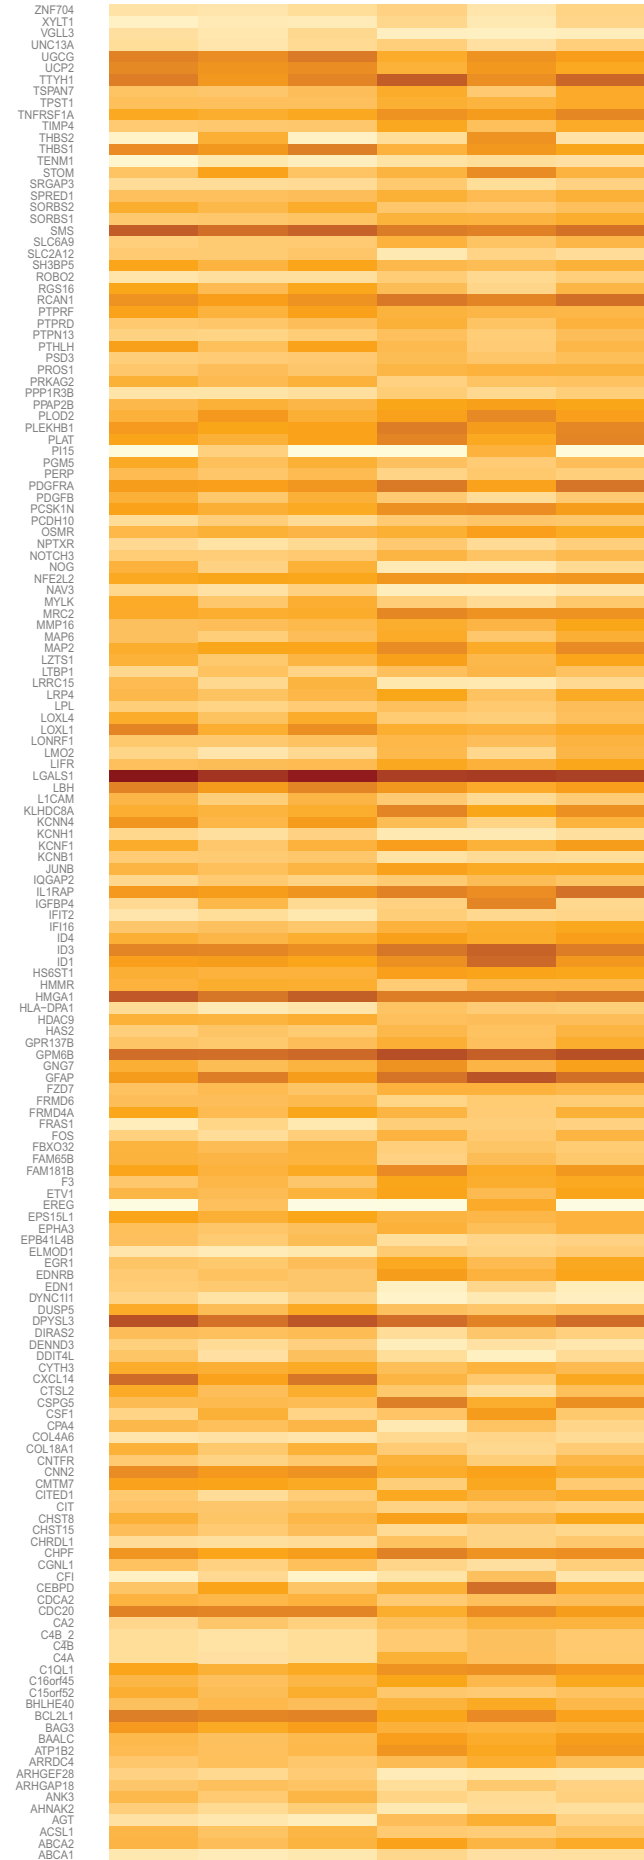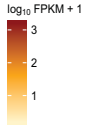

G7\_2D\_dtl.0

G7\_2D\_dtl.1

G7\_2D\_dtl.2

G7\_3D\_V\_dtl.0

G7\_3D\_V\_dtl.1

G7\_3D\_V\_dtl.2

E2\_2D\_dtl.0

E2\_2D\_dtl.1

E2\_2D\_dtl.2

E2\_3D\_V\_dtl.0

E2\_3D\_V\_dtl.1

E2\_3D\_V\_dtl.2
