# Supplementary figures and images for: A novel 3D human glioblastoma cell culture system for modeling drug and radiation responses
Source: PubMed Central journal article supplement — Neuro Oncol. 2016 Aug 30;19(2):229–41. doi: 10.1093/neuonc/now164 (PMC5463789; doi:10.1093/neuonc/now164), 2016-08-30

# Supplementary Figure 4

**A**

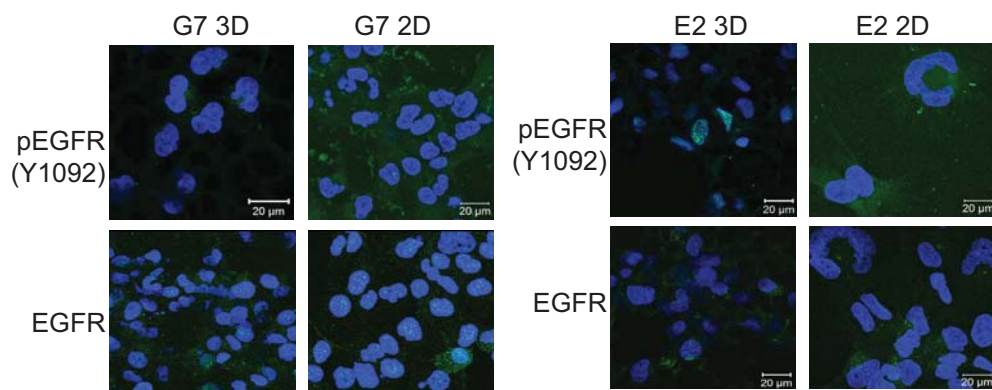

**B**

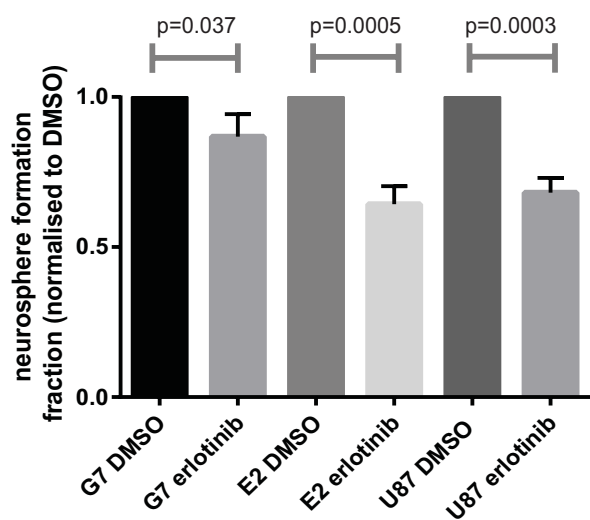

**C**

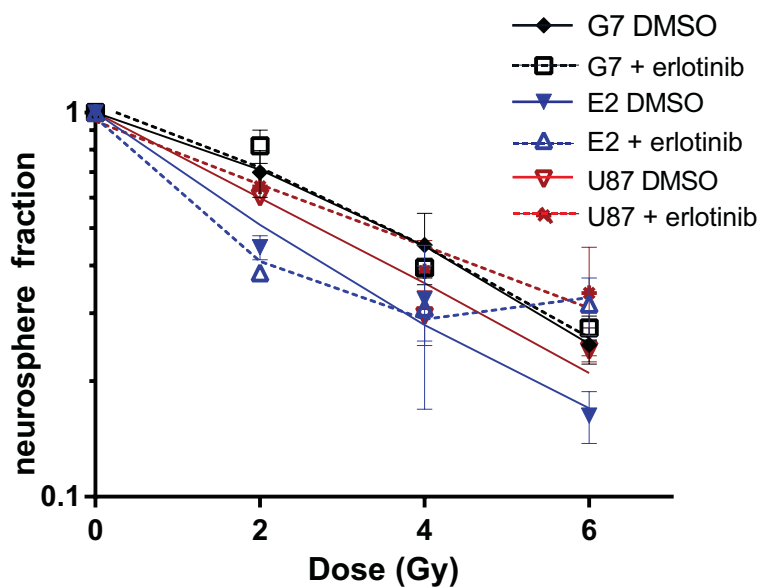

**D**

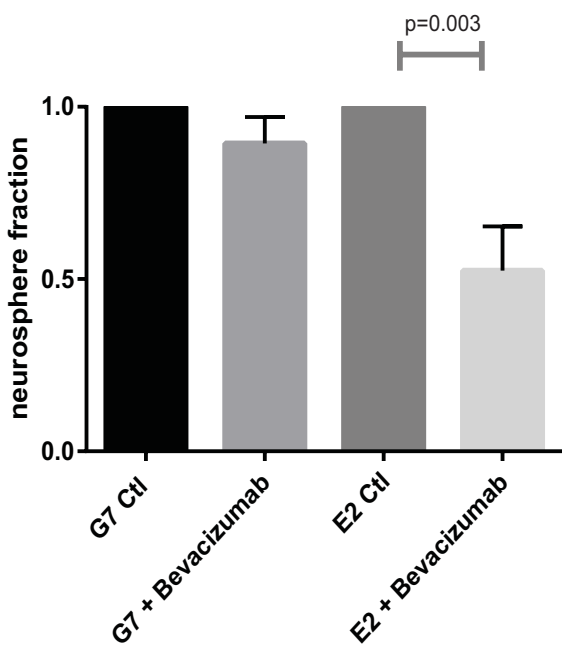

**E**

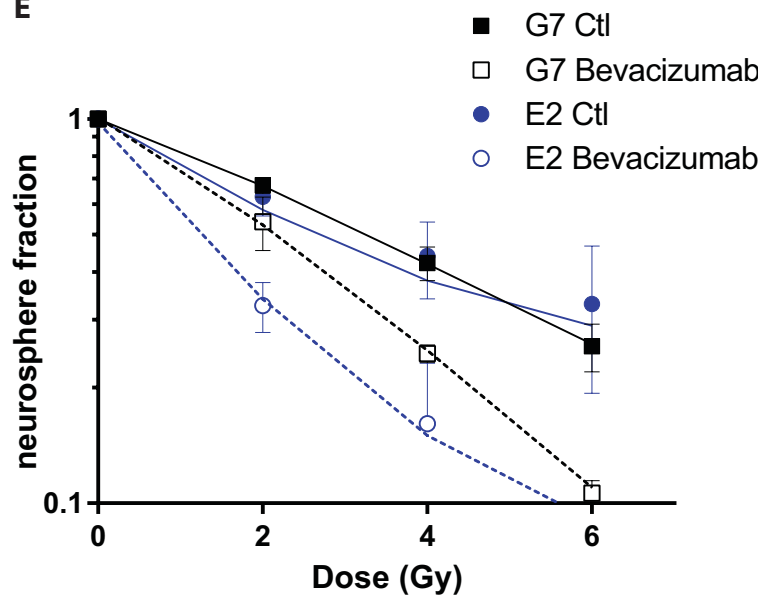

Supplement: now164_suppl_Suppl._Fig.4.pdf [file now164_suppl_Suppl._Fig.4.pdf]
